# Supplementary material for: Hierarchical α-MnO2nanowires as an efficient anode material for rechargeable lithium-ion batteries
Source: Royal Society of Chemistry journal article supplement (doi:10.1039/d1ma00755f), 2021-12-15
Supplement: d1ma00755f1.pdf [file d1ma00755f1.pdf]

## Supporting Information for

### **Hierarchical $\alpha$ -MnO<sub>2</sub> Nanowires as an Efficient Anode Material for Rechargeable Lithium-Ion Batteries**

Ediga Umeshbabu,<sup>\*a,b</sup> M. Satyanarayana,<sup>c</sup> Ashok Pullamsetty,<sup>d</sup> Guruprakash Karkera<sup>b</sup> and P. Justin<sup>\*c</sup>

<sup>a</sup>Department of Chemistry, Indian Institute of Technology Madras, Chennai - 600036, India

<sup>b</sup>Helmholtz Institute Ulm (HIU) for Electrochemical Energy Storage, Helmholtzstraße 11, D-89081 Ulm, Germany

<sup>c</sup>Department of Chemistry, Faculty of Exact Sciences, Bar-Ilan University, Ramat-Gan 5290002, Israel

<sup>d</sup>Department of Physics, Indian Institute of Technology Madras, Chennai - 600036, India

<sup>e</sup>Department of Chemistry, Rajiv Gandhi University of Knowledge Technologies, RK Valley, Kadapa 516330, Andhra Pradesh, India

---

\*Corresponding authors;

E-mail address: [umeshediga@gmail.com](mailto:umeshediga@gmail.com) (E. Umeshbabu); [ponjustin@rgukt.in](mailto:ponjustin@rgukt.in) (P. Justin)

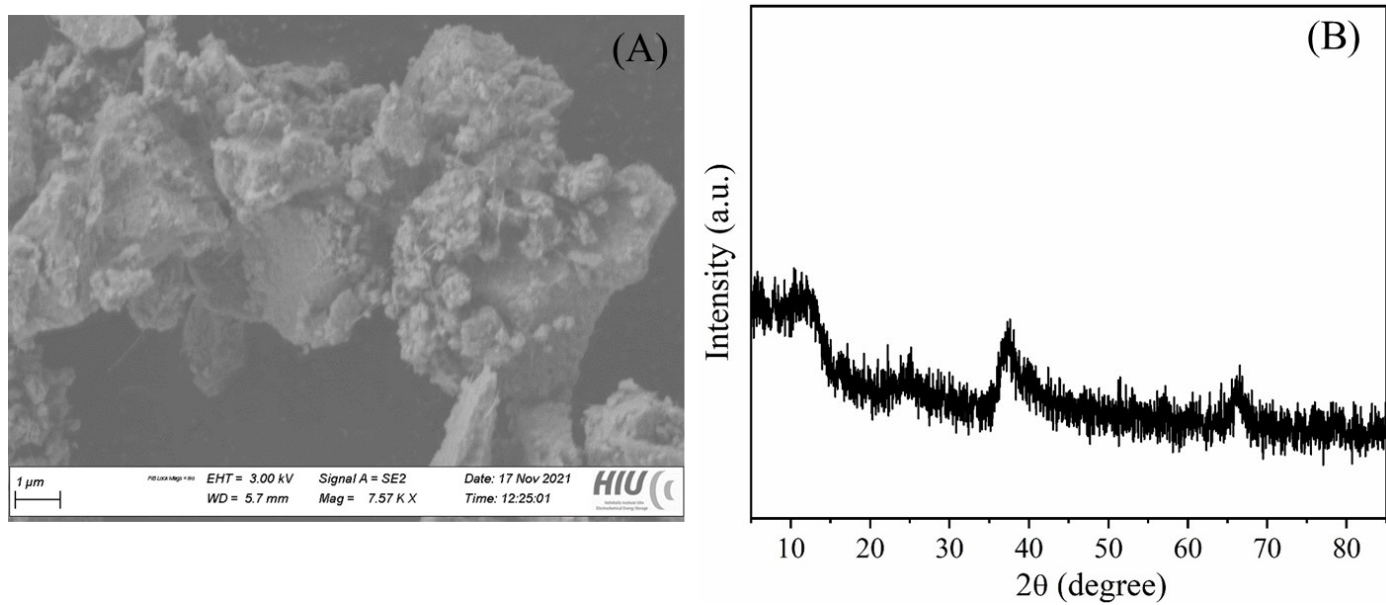

**Fig. S1** (A) FESEM image and (B) Powder XRD pattern of as-prepared MnO<sub>x</sub> precursor.
